# Supplementary material for: Iodine and Selenium Biofortification of Chervil Plants Treated with Silicon Nanoparticles
Source: MDPI journal article supplement (doi:10.3390/plants10112528), 2021-11-20
Supplement: s1 [file s1]

**Table S1.** Coefficients of correlation between mineral elements in chervil shoots.

|    | Al     | As     | B      | Ca     | Cd     | Co     | Cr     | Cu      | Fe     | I       | K      | Li     | Mg     | Mn     | Na     | Ni     | P       | Pb     | Se    | Si     | Sr    | V      |       |
|----|--------|--------|--------|--------|--------|--------|--------|---------|--------|---------|--------|--------|--------|--------|--------|--------|---------|--------|-------|--------|-------|--------|-------|
| As | 0.432  | 1      |        |        |        |        |        |         |        |         |        |        |        |        |        |        |         |        |       |        |       |        |       |
| B  | 0.666  | -0.108 | 1      |        |        |        |        |         |        |         |        |        |        |        |        |        |         |        |       |        |       |        |       |
| Ca | 0.606  | 0.163  | 0.590  | 1      |        |        |        |         |        |         |        |        |        |        |        |        |         |        |       |        |       |        |       |
| Cd | 0.384  | 0.070  | 0.459  | 0.554  | 1      |        |        |         |        |         |        |        |        |        |        |        |         |        |       |        |       |        |       |
| Co | 0.555  | 0.953a | 0.070  | 0.412  | 0.303  | 1      |        |         |        |         |        |        |        |        |        |        |         |        |       |        |       |        |       |
| Cr | 0.688d | 0.822b | 0.315  | 0.552  | 0.199  | 0.909a | 1      |         |        |         |        |        |        |        |        |        |         |        |       |        |       |        |       |
| Cu | -0.302 | -0.204 | 0.015  | 0.059  | 0.185  | -0.054 | 0.015  | 1       |        |         |        |        |        |        |        |        |         |        |       |        |       |        |       |
| Fe | 0.626  | 0.866c | 0.197  | 0.442  | 0.082  | 0.914a | 0.989a | -0.006  | 1      |         |        |        |        |        |        |        |         |        |       |        |       |        |       |
| I  | 0.391  | -0.171 | 0.282  | 0.653  | 0.733d | 0.038  | -0.021 | -0.147  | -0.126 | 1       |        |        |        |        |        |        |         |        |       |        |       |        |       |
| K  | -0.449 | -0.542 | 0.164  | -0.180 | 0.479  | -0.457 | -0.526 | 0.424   | -0.592 | 0.113   | 1      |        |        |        |        |        |         |        |       |        |       |        |       |
| Li | 0.869c | 0.513  | 0.596  | 0.742d | 0.394  | 0.698d | 0.867c | 0.118   | 0.807b | 0.283   | -0.426 | 1      |        |        |        |        |         |        |       |        |       |        |       |
| Mg | 0.079  | 0.285  | 0.175  | 0.629  | 0.307  | 0.481  | 0.583  | 0.649   | 0.538  | 0.073   | 0.006  | 0.538  | 1      |        |        |        |         |        |       |        |       |        |       |
| Mn | 0.484  | 0.907a | 0.028  | 0.420  | 0.293  | 0.979a | 0.911a | 0.133   | 0.918a | 0.008   | -0.423 | 0.716d | 0.610  | 1      |        |        |         |        |       |        |       |        |       |
| Na | -0.340 | -0.125 | -0.038 | -0.017 | -0.014 | -0.025 | 0.054  | 0.968a  | 0.057  | -0.340  | 0.288  | 0.096  | 0.638  | 0.158  | 1      |        |         |        |       |        |       |        |       |
| Ni | 0.463  | 0.052  | 0.557  | 0.936a | 0.761e | 0.336  | 0.398  | 0.260   | 0.273  | 0.738d  | 0.114  | 0.633  | 0.657  | 0.368  | 0.135  | 1      |         |        |       |        |       |        |       |
| P  | -0.438 | -0.350 | 0.111  | -0.158 | 0.383  | -0.247 | -0.303 | 0.788e  | -0.347 | -0.106  | 0.843b | -0.214 | 0.302  | -0.141 | 0.720d | 0.148  | 1       |        |       |        |       |        |       |
| Pb | 0.484  | 0.470  | 0.144  | 0.420  | 0.357  | 0.640  | 0.703d | 0.421   | 0.687d | 0.237   | -0.340 | 0.808b | 0.566  | 0.737d | 0.364  | 0.464  | -0.022  | 1      |       |        |       |        |       |
| Se | 0.177  | 0.486  | -0.271 | -0.202 | -0.626 | 0.265  | 0.244  | -0.772e | 0.333  | -0.351  | -0.773 | -0.031 | -0.394 | 0.143  | -0.608 | -0.493 | -0.844b | -0.231 | 1     |        |       |        |       |
| Si | -0.673 | 0.001  | -0.435 | -0.521 | -0.282 | -0.071 | -0.092 | 0.635   | -0.023 | -0.689d | 0.366  | -0.358 | 0.312  | 0.055  | 0.685d | -0.402 | 0.580   | -0.026 | -     | 1      |       |        |       |
| Sr | 0.461  | 0.625  | -0.040 | 0.470  | 0.070  | 0.731d | 0.785b | 0.305   | 0.801b | 0.067   | -0.618 | 0.758e | 0.639  | 0.820b | 0.338  | 0.375  | -0.237  | 0.898a | 0.074 | -0.006 | 1     |        |       |
| V  | 0.795b | 0.875c | 0.263  | 0.465  | 0.316  | 0.934a | 0.922a | -0.224  | 0.913a | 0.145   | -0.543 | 0.816b | 0.306  | 0.883c | -0.218 | 0.336  | -0.418  | 0.672  | 0.329 | -0.304 | 0.693 | 1      |       |
| Zn | 0.096  | 0.122  | 0.032  | 0.266  | -0.086 | 0.251  | 0.444  | 0.762e  | 0.454  | -0.190  | -0.224 | 0.516  | 0.714d | 0.428  | 0.794e | 0.254  | 0.220   | 0.740d | -     | 0.323  | 0.393 | 0.759e | 0.186 |
| Mo | 0.722d | 0.176  | 0.557  | 0.857b | 0.214  | 0.375  | 0.650  | 0.036   | 0.580  | 0.412   | -0.475 | 0.848b | 0.530  | 0.407  | 0.006  | 0.680d | -0.387  | 0.612  | 0.002 | -0.468 | 0.634 | 0.527  |       |

a) P<0.001; b) P<0.01; c) P<0.002; d) P<0.05; e) P<0.02
